# Supplementary material for: Spontaneous Hind Limb Paralysis Due to Acute Precursor B Cell Leukemia in RAG1-deficient Mice
Source: PubMed Central journal article supplement (PMC9374608; doi:10.1007/s12031-022-02025-7), 2022-05-18
Supplement: 12031_2022_2025_MOESM1_ESM.pdf [file 12031_2022_2025_MOESM1_ESM.pdf]

## **Spontaneous hind limb paralysis due to acute precursor B cell leukemia in RAG1-deficient mice**

Liu Feifei, Anna Richter, Jens Runge, Jonas Keiler, Andreas Hermann, Markus Kipp and Sarah Joost

Journal of Molecular Neuroscience

Corresponding author: Markus Kipp, Institute of Anatomy, University Medical Center Rostock, markus.kipp@med.uni-rostock.de

### **Supplemental material 1: Pathogens tested for annual health monitoring**

Two sentinel mice from each animal room, confronted with used bedding from all other cages of that room for 4 weeks before testing.

#### **Viruses:**

MHV (mouse hepatitis virus)  
EDIM (epizootic diarrhea of infant mice)  
MNV (murine norovirus)  
MVM (minute virus of mice)  
MPV (mouse parvovirus)  
TMEV (Theilers murine encephalomyelitis virus)  
LCMV (lymphocytic choriomeningitis virus)  
MAdV1 (mouse adenovirus 1)  
MAdV2 (mouse adenovirus 2)  
ECTV (ectromelia virus)  
PVM (pneumonia virus of mice)  
Reo (reovirus type 3)

#### **Bacteria, mycoplasma, fungi:**

Helicobacter spp.  
Rodentibacter spp.  
Rodentibacter heylii/pneumotropicus  
Streptococci  $\beta$ -haemolytic (not group D)  
Streptococcus pneumoniae  
Citrobacter rodentium  
Clostridium piliforme (Tyzzer's disease)  
Corynebacterium kutscheri  
Mycoplasma pulmonis  
Salmonella spp.  
Streptobacillus moniliformis

#### **Ectoparasites:**

Arthropodes

#### **Endoparasites:**

Aspiculuris spp.  
Syphacia spp.  
Chilomastix spp.  
Coccidia spp.

Entamoeba spp.

Giardia spp.

Spirochete muris

Trichomonas spp.

Flagellates
